# Supplementary material for: Comparative salivary proteomics analysis of children with and without dental caries using the iTRAQ/MRM approach
Source: Springer Nature journal article supplement (doi:10.1186/s12967-018-1388-8), 2018-01-19

**Comparative salivary proteomics analysis of children with and without dental caries using the iTRAQ/MRM approach.**

Kun Wang, Yufei Wang, Xiuqing Wang, Qian Ren, Sili Han, Longjiang Ding, Zhongcheng Li, Xuedong Zhou, Wei Li, Linglin Zhang\*

State Key Laboratory of Oral Diseases & National Clinical Research Center for Oral Diseases & Dept. of Cariology and Endodontics West China Hospital of Stomatology, Sichuan University, Chengdu, Sichuan, China.

\*Corresponding author: Linglin Zhang, Professor, State Key Laboratory of Oral Diseases & National Clinical Research Centre for Oral Disease, Dept. of Cariology and Endodontics West China Hospital of Stomatology, Sichuan University, Chengdu, China. Postal Address: No.14, Section 3 of Renmin South Road, Chengdu, China. Telephone: 86-028-85503470; E-mail: zhll\_sc@163.com.

**Fig. S1. The correlation analysis between each experimental group and its replicate in iTRAQ quantification.**

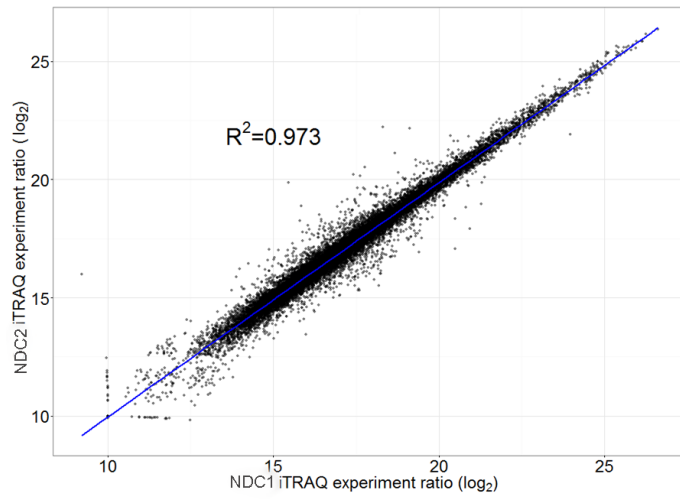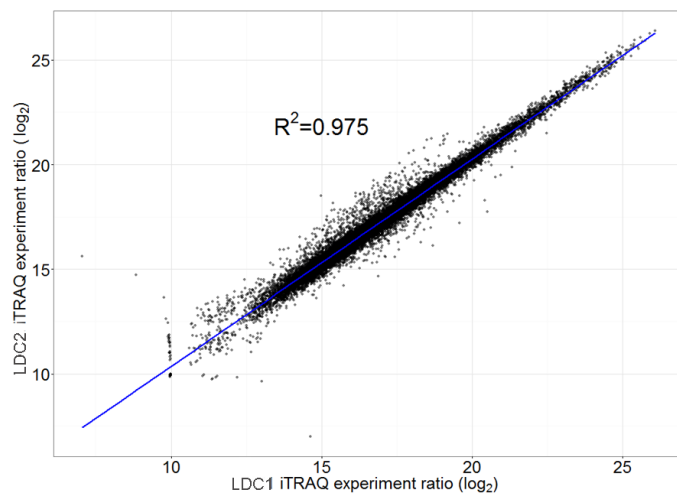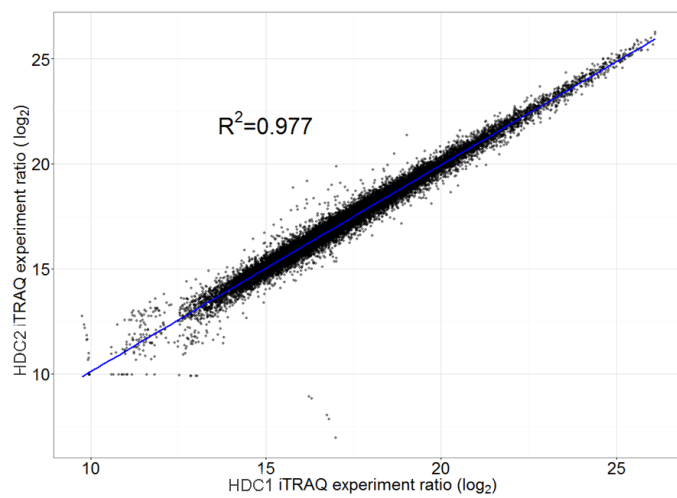

**Fig. S2. Log ratio of relative intensity for differentially expressed proteins in HDC vs NDC (A), LDC vs NDC (B) and HDC vs LDC (C) groups.**

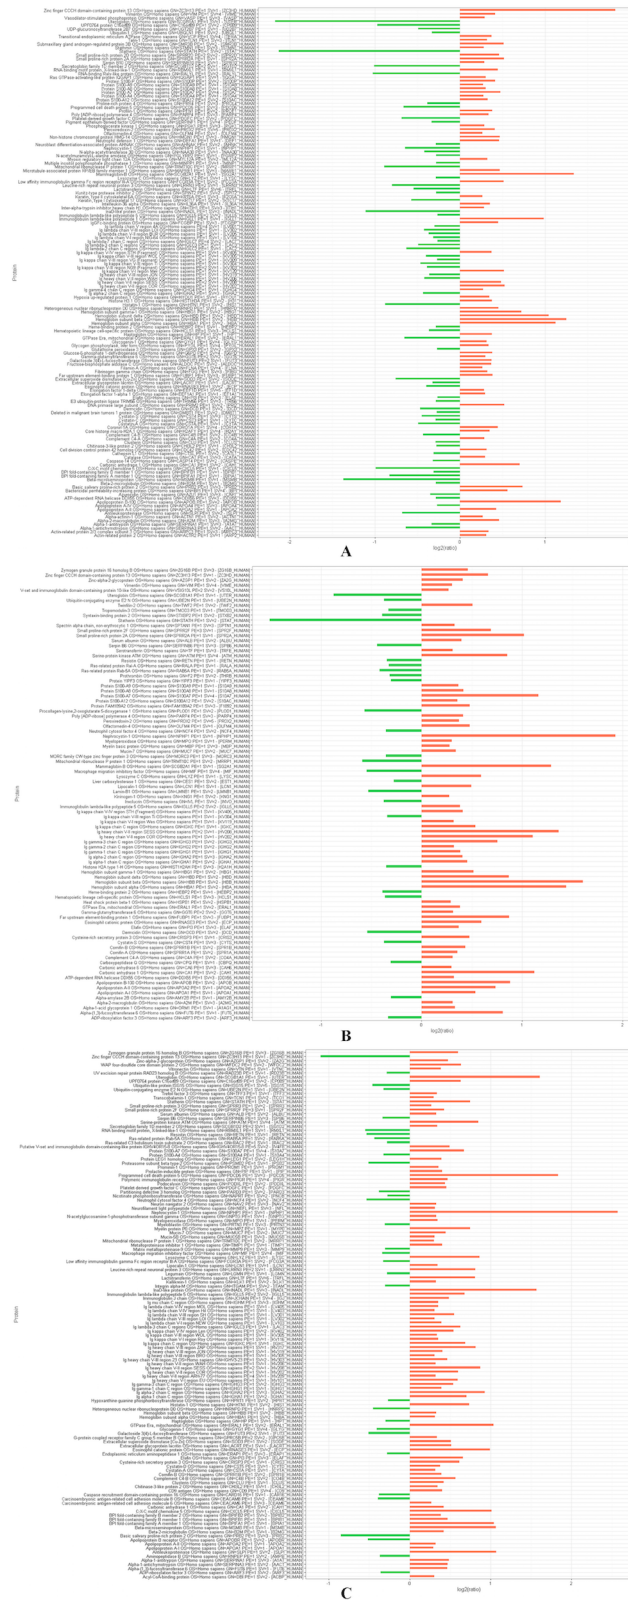



**Fig. S4. Pathway analysis of up-regulated and down-regulated proteins based on KEGG in HDC vs NDC (A), LDC vs NDC (B) and HDC vs LDC (C) groups.**

Differentially expressed proteins were classified in different comparison groups according to the KEGG database.

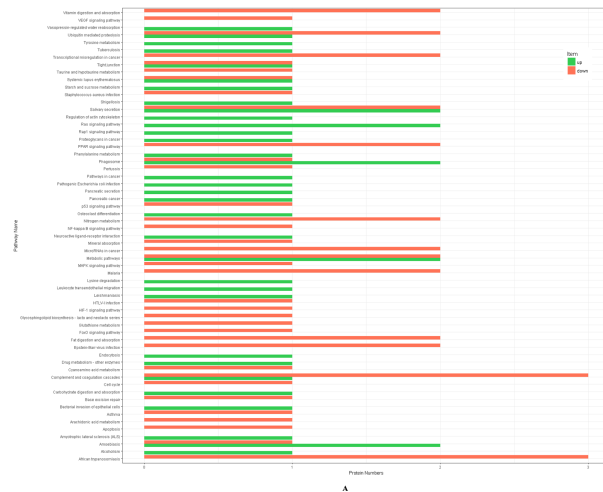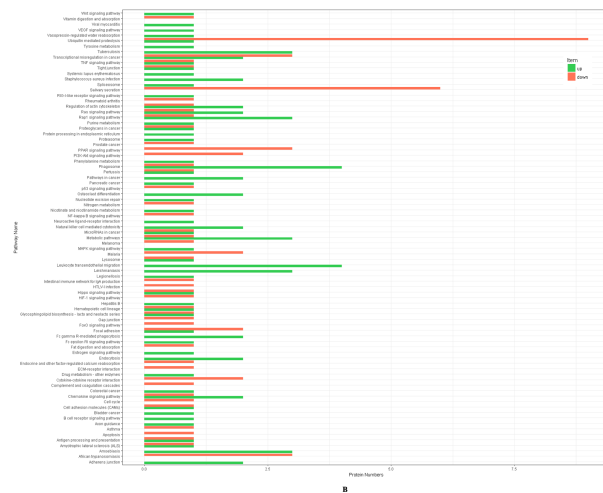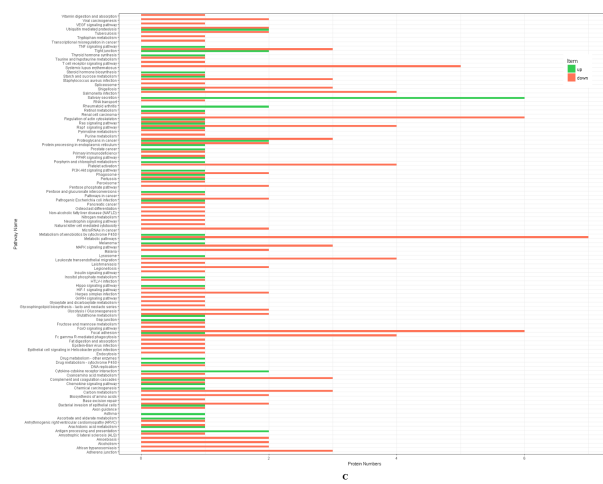

**Fig. S5. Hierarchical Clustering analysis of differentially expressed proteins found commonly in HDC vs NDC, LDC vs NDC, and HDC vs LDC groups.**

**Saliva samples are shown in the columns, and proteins are shown in the rows.**

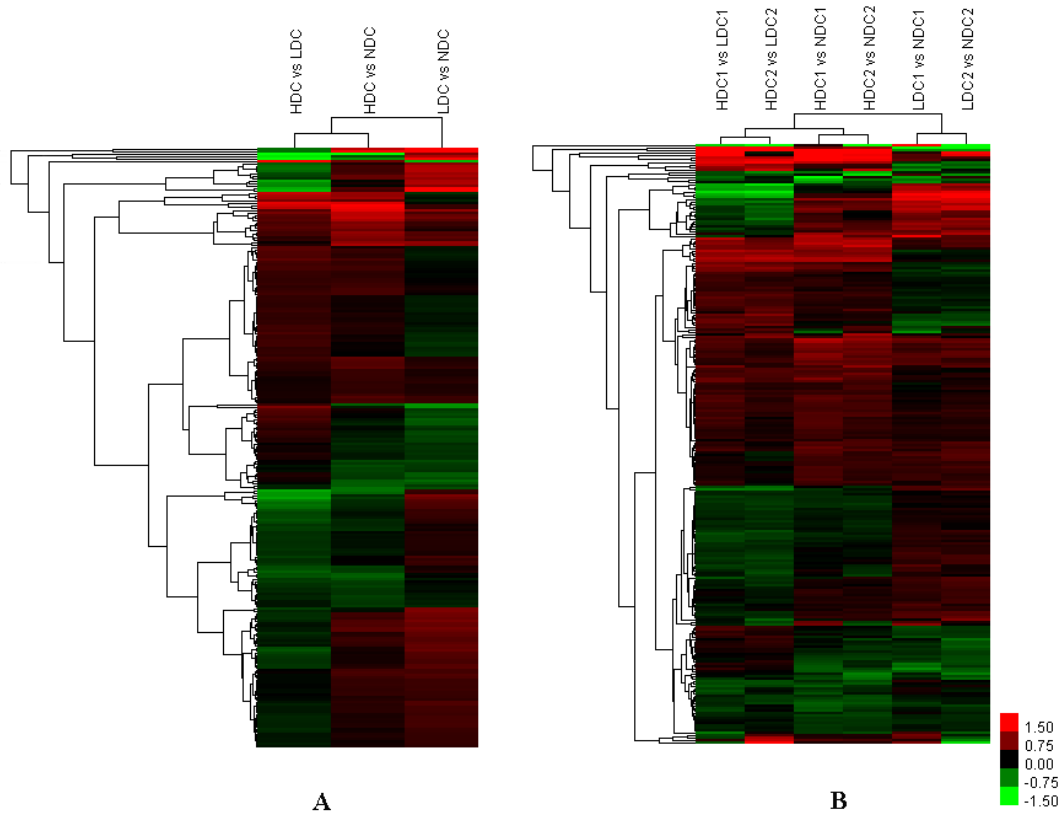

Supplement: MOESM2 [file 15389892]
